# Supplementary material
Source: PubMed Central journal article supplement (PMC6187624)
Supplement: supp_RA118.003440_137414_2_supp_184887_pdghhq.pdf [file supp_RA118.003440_137414_2_supp_184887_pdghhq.pdf]

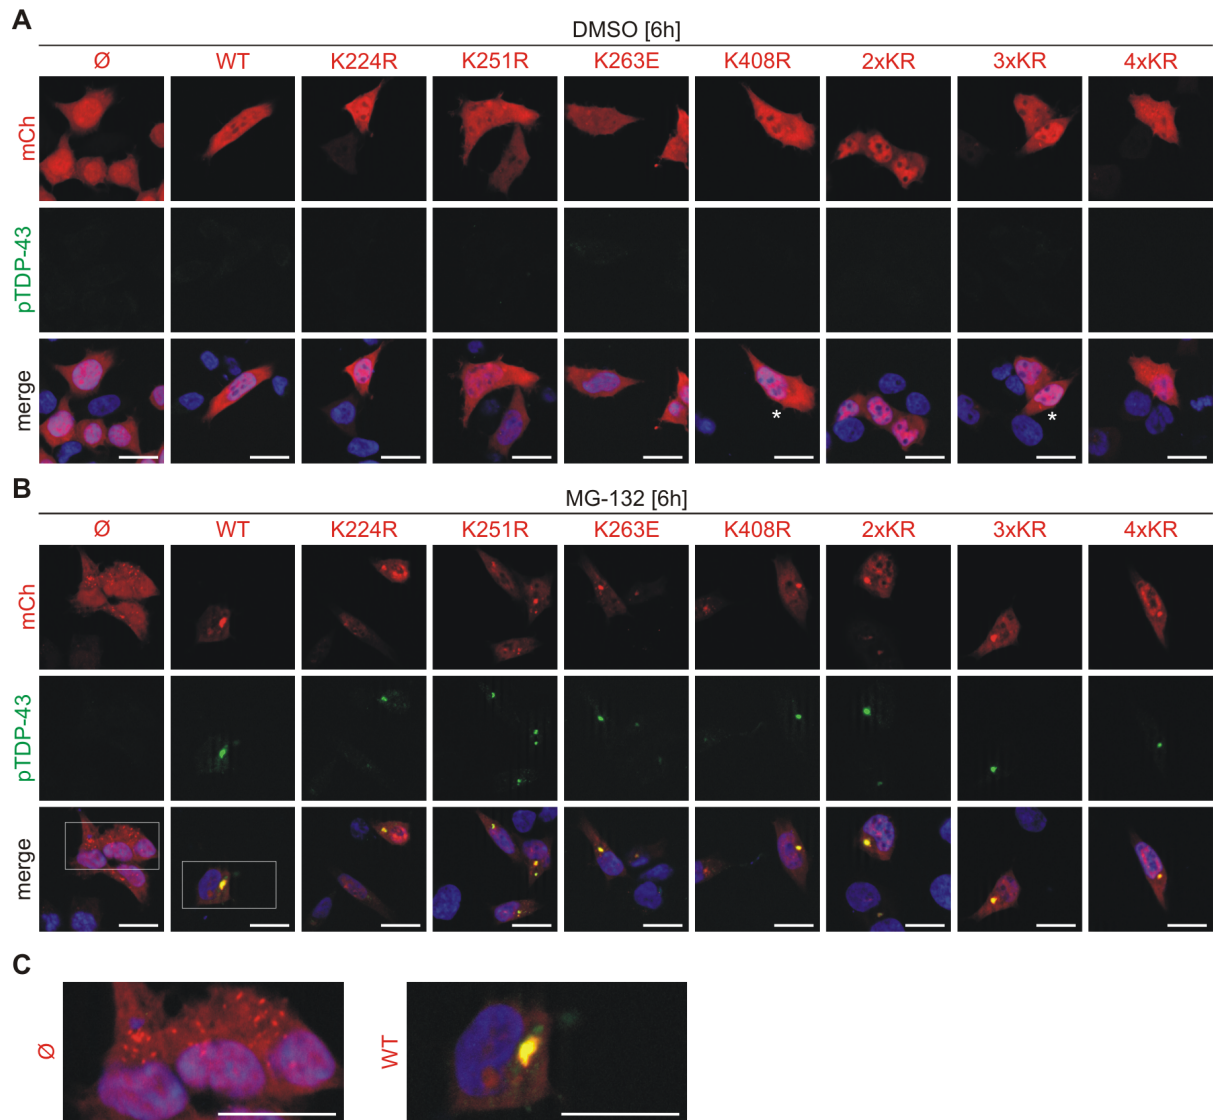

**Supporting Figure S1. Aggregate formation of mCherry-CTF lysine mutants upon proteasomal inhibition.** HEK293E cells were transfected with mCherry-CTF<sup>WT</sup>, the indicated CTF lysine mutants or mCherry-control (∅). Cells were treated either with DMSO (*A*) or 10 $\mu$ M MG-132 (*B*) for 6h to induce aggregate formation, followed by fixation with PFA and immunolabeling with rat-anti-phospho-TDP-43 (green). Merged images show nuclear counterstaining with Hoechst 33342 (blue). Scale bars correspond to 20 $\mu$ M. Asterisks (\*) in (*A*) label examples for cells with aggresome-like inclusion. (*C*) Magnification of mCherry-∅ and -CTF<sup>WT</sup> expressing cells upon MG-132 treatment from (*B*) to illustrate the tiny aggregates formed of mCherry in comparison to aggresome-like aggregates formed of mCherry-CTF.

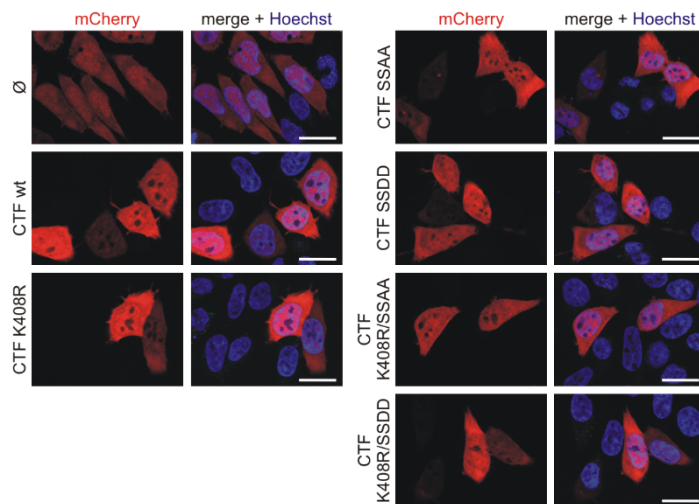

**Supporting Figure S2. Localization of mCherry-CTF phospho-mimic and -dead mutants.** HEK293E cells were transfected with mCherry-CTF<sup>WT</sup>, -CTF<sup>K408R</sup>, -CTF<sup>SSAA</sup>, -CTF<sup>SSDD</sup> or the indicated double mutants. Cells were fixed after 72h, nuclei were counterstained with Hoechst33342 (blue) and epifluorescence of mCherry tag (red) was imaged. Scale bars correspond to 20 $\mu$ m.

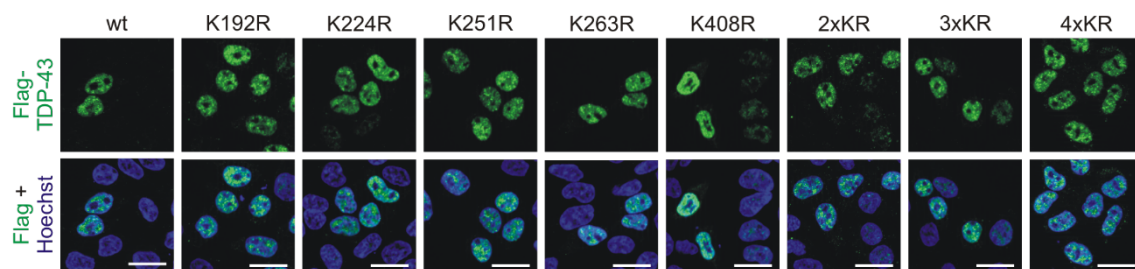

**Supporting Figure S3. Localization of FLAG-TDP-43 C-terminal lysine mutants.** HEK293E cells were transfected with FLAG-TDP-43<sup>WT</sup> or the indicated C-terminal lysine mutants. The cells were fixed after 72h and overexpressed TDP-43 proteins were immunolabeled with mouse-anti-FLAG antibody (green), nuclei were counterstained with Hoechst 33342 (blue). Scale bars correspond to 20 $\mu$ m.

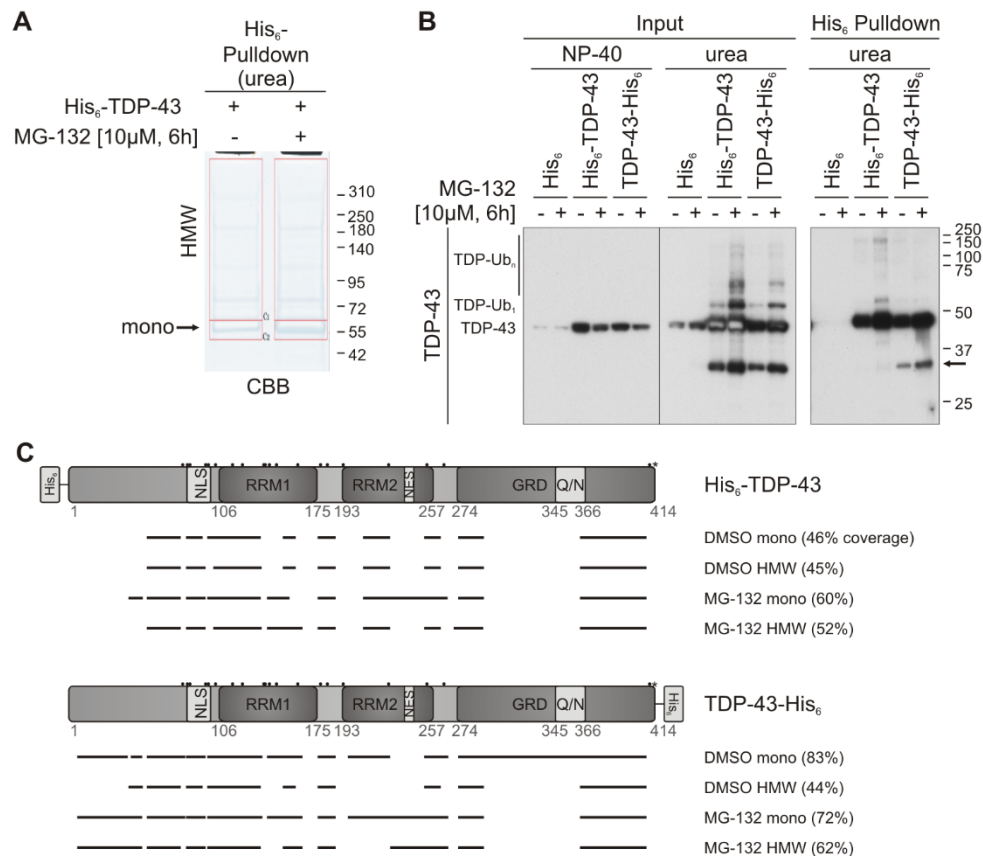

**Supporting Figure S4. Identification of TDP-43 ubiquitinylation sites with LC-MS/MS analysis.** HEK293E cells were transfected with His<sub>6</sub>-TDP-43 or TDP-43-His<sub>6</sub> as indicated. In (+) conditions, ubiquitinylation was stabilized by proteasomal inhibition with MG-132 for 6h; (-) conditions are controls. The cells were harvested and separated into a soluble NP40 and insoluble urea fraction. 6xHis-tagged TDP-43 species were purified with Ni-NTA agarose. (A) Affinity purified His<sub>6</sub>-TDP-43 samples were separated with SDS-PAGE, followed by coomassie brilliant blue (CBB) staining of the gel. The indicated mono-TDP-43 (mono) and higher molecular weight smear (HMW) were further subjected to mass spectrometry. (B) Western blot analysis of total protein (Input) and NP40- and urea eluates (Pulldown) with antibodies detecting TDP-43. TDP-Ub<sub>1</sub> - mono-ubiquitinylation TDP-43; TDP-Ub<sub>n</sub> - multi-ubiquitinylation TDP-43; arrow labels affinity-enriched 35kDa CTF (C) Schematic overview of His<sub>6</sub>-TDP-43 (upper panel) and TDP-43-His<sub>6</sub> (lower panel), including the lysine residues as well as localization of the peptide fragments that were identified by mass spectrometry (visualizing MS coverage of TDP-43).

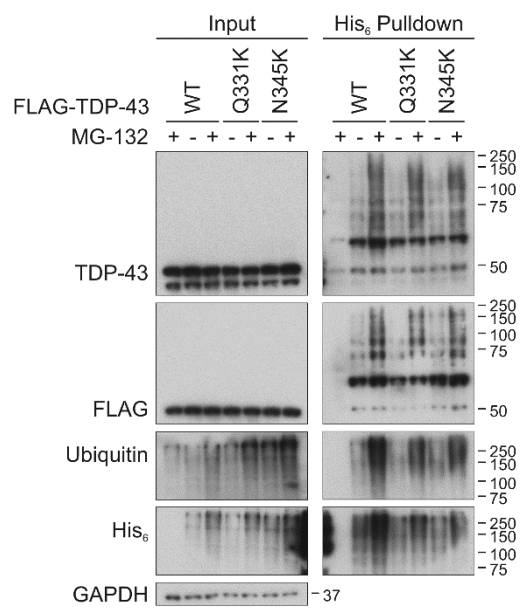

**Supporting Figure S5. Ubiquitylation of clinical TDP-43 mutants introducing lysine residues.** HEK293E cells expressing the indicated FLAG-TDP-43 constructs and His<sub>6</sub>-Ubiquitin were subjected to proteasomal inhibition with MG-132, followed by lysis with 8M urea buffer. His<sub>6</sub>-Ubiquitin conjugated proteins were purified with Ni-NTA agarose and analyzed by Western blot using antibodies against TDP-43, FLAG, ubiquitin, His<sub>6</sub> and GAPDH.
